# Supplementary material
Source: bioRxiv or medRxiv preprint supplement (https://www.biorxiv.org/highwire/filestream/27149/field_highwire_adjunct_files/1/063735-2.pdf)
Supplement: Supplementary file [file 063735-2.pdf]

| <i>Presence/Absence Models</i> |                                                |            |                    |                      |                        |                                        |                                                    |
|--------------------------------|------------------------------------------------|------------|--------------------|----------------------|------------------------|----------------------------------------|----------------------------------------------------|
| <b>model</b>                   | <b>formula</b>                                 | <b>BIC</b> | <b>Model prob.</b> | <b>D<sup>2</sup></b> | <b>OOS model prob.</b> | <b>OOS classification error (DENV)</b> | <b>OOS classification error (CHIKV &amp; ZIKV)</b> |
| PA1                            | pa ~ lpop*DEN - DEN                            | 1444       | 0                  | 0.382                | 0                      | 0.224                                  | 0.309                                              |
| PA2                            | pa ~ (propTGDP + lGDP + lpop)*DEN - DEN        | 1644       | 0                  | 0.469                | 0                      | 0.142                                  | 0.434                                              |
| PA3                            | pa ~ (R0.GR0+lpop)*DEN - DEN                   | 1465       | 0                  | 0.461                | 0                      | 0.093                                  | 0.338                                              |
| PA4                            | pa ~ (R0.GR0 + propTGDP + lGDP+lpop)*DEN - DEN | 1375       | 0.008              | 0.505                | 0.01                   | 0.118                                  | 0.342                                              |
| PA5                            | pa ~ R0.GR0 + propTGDP + (lGDP+lpop)*DEN - DEN | 1365       | 0.992              | 0.503                | 0.99                   | 0.12                                   | 0.351                                              |
| PA6                            | pa ~ R0.GR0.alt*DEN - DEN                      | 1455       | 0                  | 0.432                | 0                      | 0.096                                  | 0.337                                              |

| <i>Incidence Models</i> |                                                |            |                    |                      |                        |                                           |  |
|-------------------------|------------------------------------------------|------------|--------------------|----------------------|------------------------|-------------------------------------------|--|
| <b>model</b>            | <b>formula</b>                                 | <b>BIC</b> | <b>Model prob.</b> | <b>D<sup>2</sup></b> | <b>OOS model prob.</b> | <b>OOS mean absolute percentage error</b> |  |
| IM1                     | l.inc ~ lpop*DEN-DEN                           | 2593       | 0                  | 0.465                | 0                      | 0.169                                     |  |
| IM2                     | l.inc ~ (propTGDP + lGDP + lpop)*DEN-DEN       | 2559       | 0                  | 0.506                | 0                      | 0.169                                     |  |
| IM3                     | l.inc ~ (R0 + lpop)*DEN-DEN                    | 2484       | 0                  | 0.55                 | 0                      | 0.148                                     |  |
| IM4                     | l.inc ~ (R0.alt)*DEN-DEN                       | 2433       | 0.052              | 0.595                | 0.058                  | 0.14                                      |  |
| IM5                     | l.inc ~ (R0 + propTGDP + lGDP + lpop)*DEN-DEN  | 2427       | 0.948              | 0.595                | 0.942                  | 0.14                                      |  |
| IM6                     | l.inc ~ (R0 + propTGDP + lpop)*DEN + lGDP -DEN | 2501       | 0                  | 0.531                | 0                      | 0.153                                     |  |

**Table S4:** Generalized linear models used to validate the  $R_0(T)$  model. Presence/absence models used a Binomial distribution and incidence models used a Gamma distribution. “- DEN” indicates that separate y-intercepts were not fit for DENV versus CHIKV/ZIKV (only interaction terms). Abbreviations used in the table are listed below.

*Model terms and abbreviations*

OOS = out-of-sample

BIC = Bayesian Information Criterion

Model prob. = model probability based on BIC

$D^2$  = deviance explained

pa = presence-absence

lpop = log(population size)

DEN = indicator of DENV (DEN = 1) or CHIKV or ZIKV (DEN = 0); -DEN indicates that the main effect for this term was not included

lGDP = log(gross domestic product)

propTGDP = proportion of GDP in tourism

R0.GR0 =  $\text{Prob}(R_0(T) > 0)$

R0.GR0.alt =  $\text{Prob}(R_0(T) > 0) * \log(\text{population size})$

l.inc = log(incidence) for incidence > 0

R0 =  $R_0(T)$

lR0.alt =  $\log(R_0(T) * \text{population size})$
